# Supplementary material for: Benefits and Limitations to Plastic Mulching and Nitrogen Fertilization on Grain Yield and Sulfur Nutrition: Multi-Site Field Trials in the Semiarid Area of China
Source: Frontiers journal article supplement (doi:10.3389/fpls.2022.799093), 2022-02-22
Supplement: Presentation_1.pdf [file Presentation_1.pdf]

**TABLE S1**

Anthesis and harvest date at each experimental site in the two cropping years (2014–2015 and 2015–2016).

| Province | Site       | Sampling date-Anthesis |         | Sampling date-Harvest |         |
|----------|------------|------------------------|---------|-----------------------|---------|
|          |            | 2015                   | 2016    | 2015                  | 2016    |
| Shanxi   | Tongcheng  | 2 May                  | 1 May   | 2 Jun.                | 3 Jun.  |
|          | Liujiayuan | 4 May                  | 5 May   | 7 Jun.                | 12 Jun. |
| Shaanxi  | Yujiagong  | 11 May                 | 11 May  | 17 Jun.               | 13 Jun. |
|          | Dingjia    | 15 May                 | 15 May  | 1 Jul.                | 21 Jun. |
| Gansu    | Yongqing   | 28 May                 | 27 May  | 25 Jun.               | 27 Jun. |
|          | Changhe    | 30 May                 | 6 Jun.  | 25 Jun.               | 10 Jul. |
|          | Pingxiang  | 4 Jun.                 | 10 Jun. | 10 Jul.               | 15 Jul. |

**TABLE S2**

Impact of plastic mulching on grain yield, grain S concentration, and grain S requirement of winter wheat in dryland during the two cropping years of 2014–2015 and 2015–2016.

| Year      | Province | Grain yield (kg ha <sup>-1</sup> ) |                  | Grain S concentration (g kg <sup>-1</sup> ) |                  | Grain S requirement (kg 1000 kg <sup>-1</sup> grain) |                  |
|-----------|----------|------------------------------------|------------------|---------------------------------------------|------------------|------------------------------------------------------|------------------|
|           |          | No mulching                        | Plastic mulching | No mulching                                 | Plastic mulching | No mulching                                          | Plastic mulching |
| 2014–2015 | Shanxi   | 6154±265b                          | 7212±345a        | 1.96±0.10a                                  | 1.79±0.11b       | 4.32±0.15a                                           | 3.93±0.21a       |
|           | Shaanxi  | 4582±124b                          | 5292±145a        | 1.78±0.02a                                  | 1.63±0.04b       | 4.18±0.13a                                           | 3.75±0.14b       |
|           | Gansu    | 4552±205a                          | 4687±298a        | 1.68±0.07a                                  | 1.49±0.10b       | 2.76±0.14a                                           | 2.52±0.14a       |
|           | Average  | 4894±136b                          | 5498±186a        | 1.79±0.03a                                  | 1.62±0.04b       | 3.77±0.13a                                           | 3.41±0.12b       |
| 2015–2016 | Shanxi   | 5559±136a                          | 5541±234a        | 2.07±0.09a                                  | 1.80±0.09b       | 3.60±0.07a                                           | 3.43±0.11b       |
|           | Shaanxi  | 5335±145a                          | 5486±203a        | 1.83±0.05a                                  | 1.68±0.03b       | 4.09±0.14a                                           | 3.77±0.09b       |
|           | Gansu    | 2400±102b                          | 4251±184a        | 2.16±0.04a                                  | 1.96±0.03b       | 4.61±0.14a                                           | 3.93±0.12a       |
|           | Average  | 4482±217b                          | 5110±147a        | 1.98±0.04a                                  | 1.79±0.03b       | 4.15±0.10a                                           | 3.75±0.07b       |

Different lowercase letters indicate significant differences ( $P<0.05$ ) between plastic mulching and no mulching.

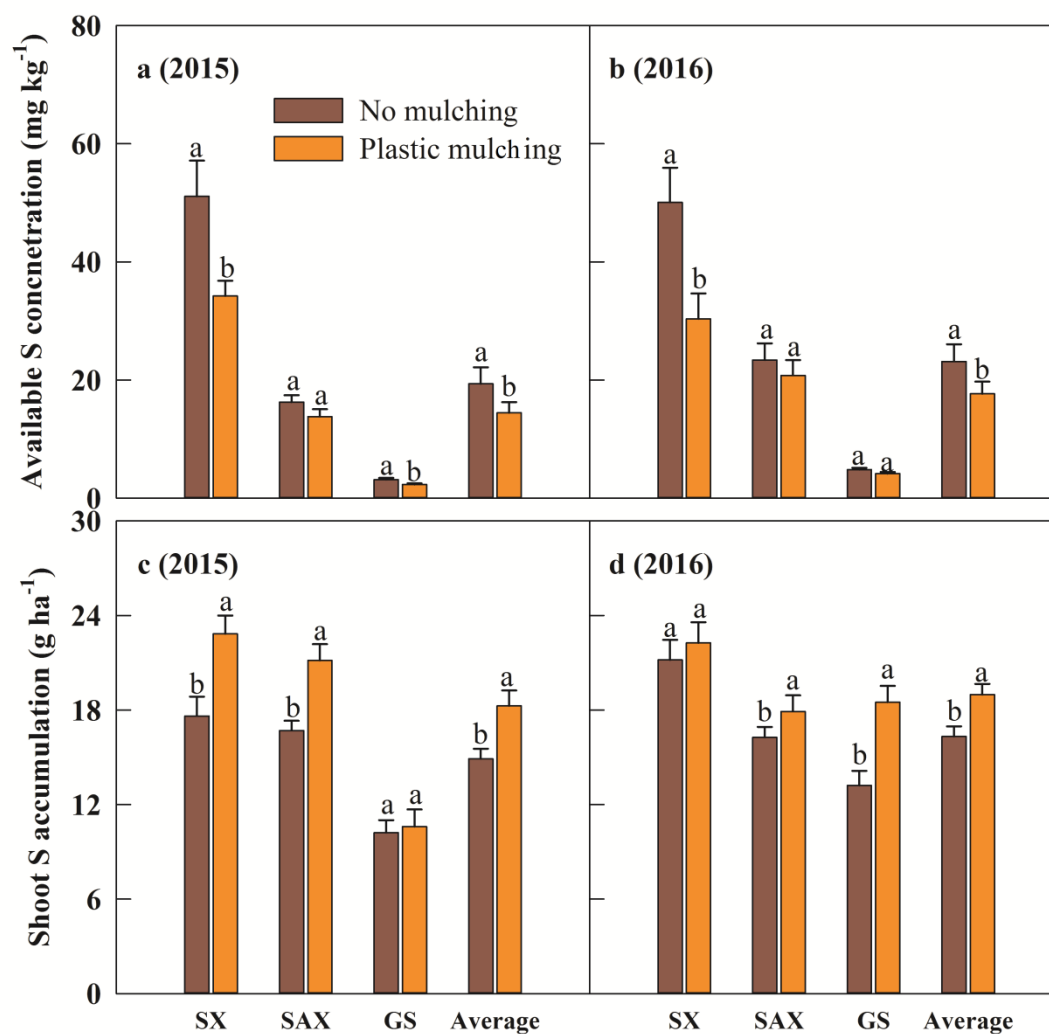

**FIGURE S1** Impact of plastic mulching on soil available concentration (a, b) and shoot S accumulation (c, d) of winter wheat at anthesis during the two cropping years of 2014–2015 and 2015–2016. SX: Shanxi, SAX: Shaanxi, GS: Gansu. Different lowercase letters indicate significant differences ( $P < 0.05$ ) between plastic mulching and no mulching.

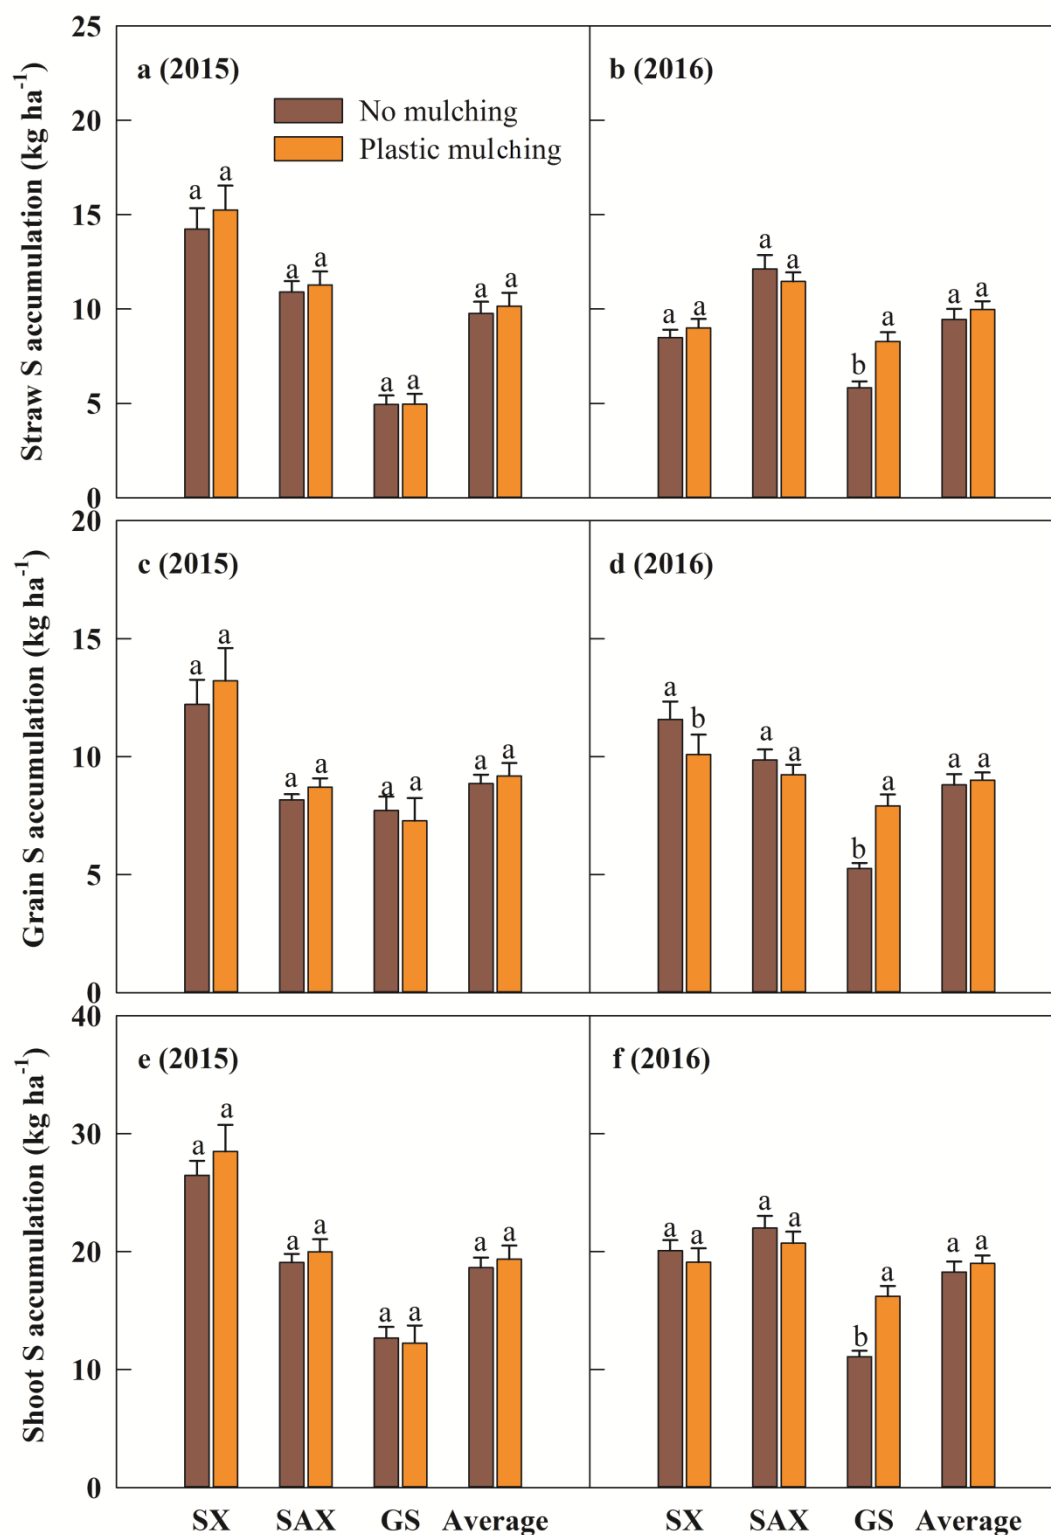

**FIGURE S2** Impact of plastic mulching on straw S accumulation (a, b), grain S accumulation (c, d), and shoot S accumulation of winter wheat at maturity during the two cropping years of 2014–2015 and 2015–2016. SX: Shanxi, SAX: Shaanxi, GS: Gansu. Different lowercase letters indicate significant differences ( $P < 0.05$ ) between plastic mulching and no mulching.

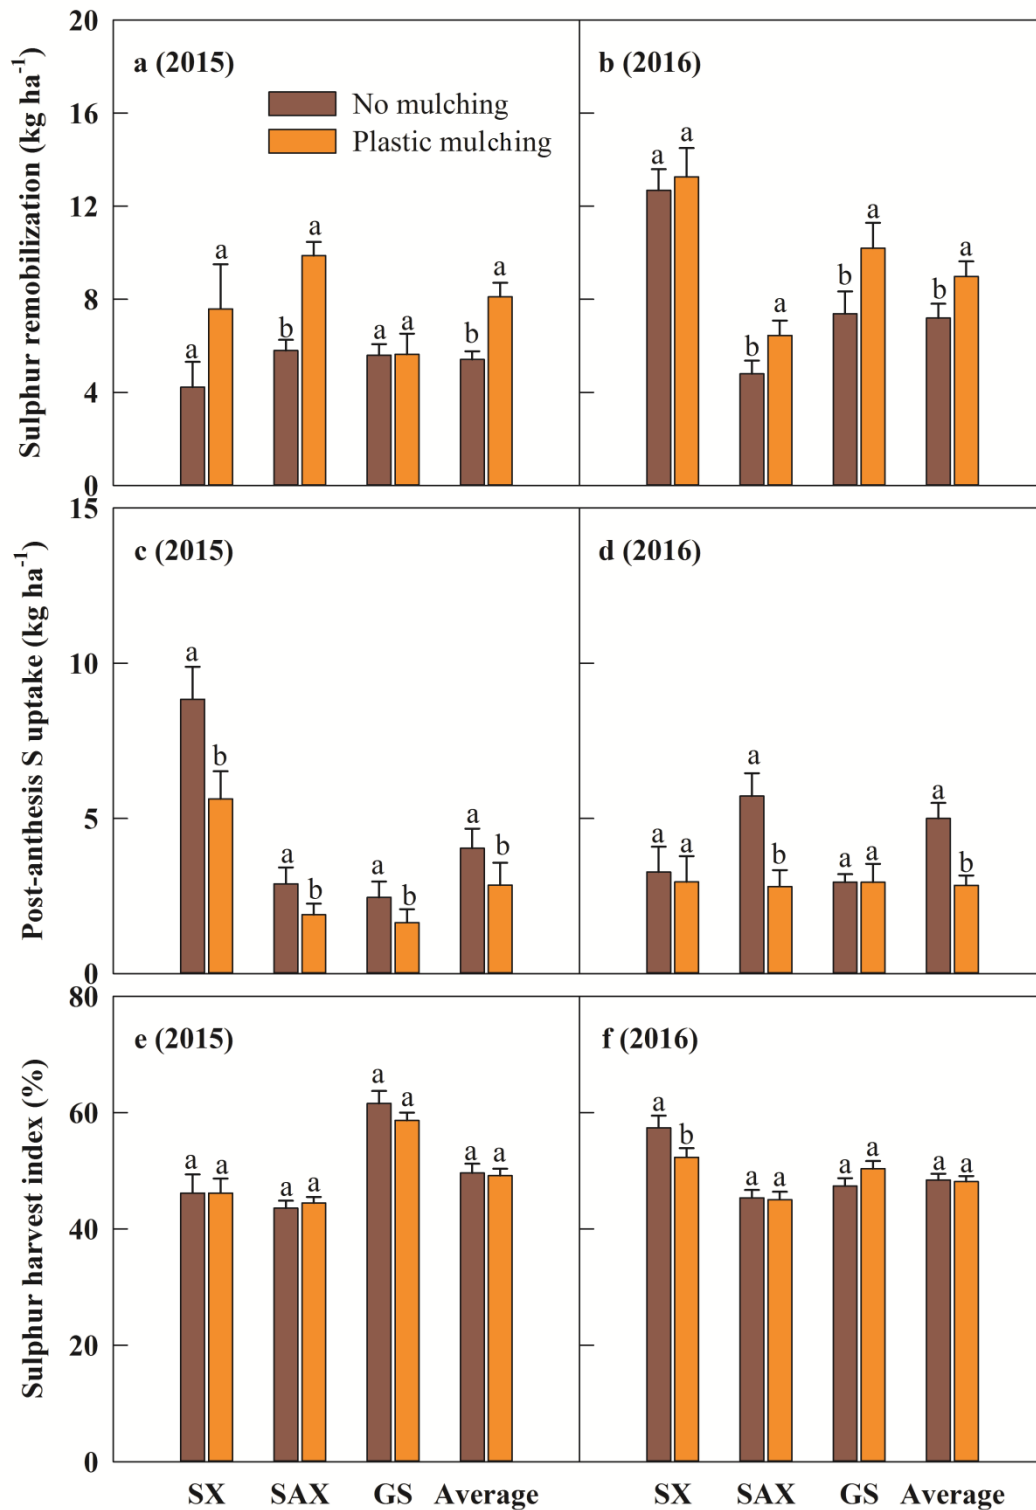

**FIGURE S3** Impact of plastic mulching on S remobilization (a, b), post-anthesis S uptake (c, d), and S harvest index of winter wheat at maturity during the two cropping years of 2014–2015 and 2015–2016. SX: Shanxi, SAX: Shaanxi, GS: Gansu. Different lowercase letters indicate significant differences ( $P < 0.05$ ) between plastic mulching and no mulching.

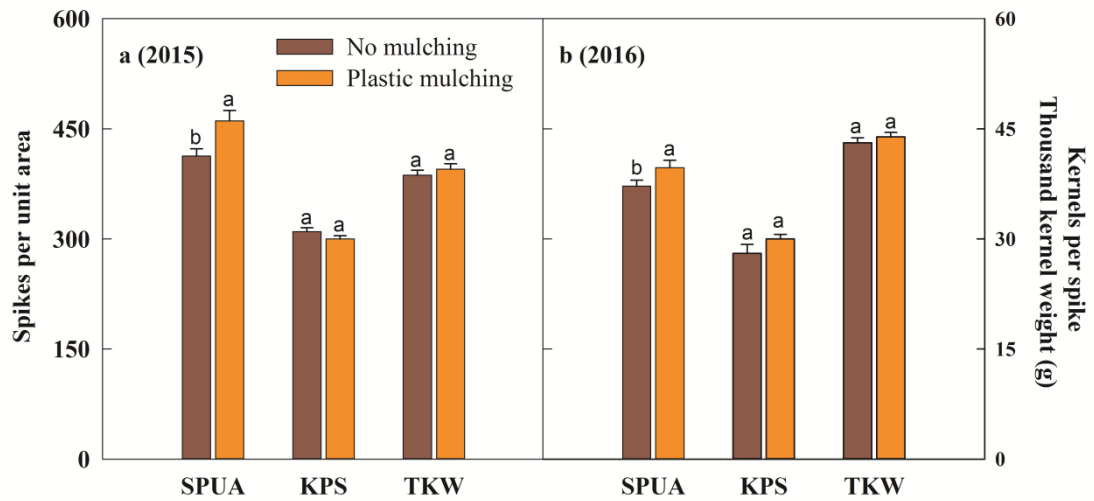

**FIGURE S4** Impact of plastic mulching on spikes per unit area (SPUA), kernel per spike (KPS), and thousand kernel weight (TKW) of winter wheat in dryland during the two cropping years of 2014–2015 and 2015–2016. Different lowercase letters indicate significant differences ( $P<0.05$ ) between plastic mulching and no mulching.

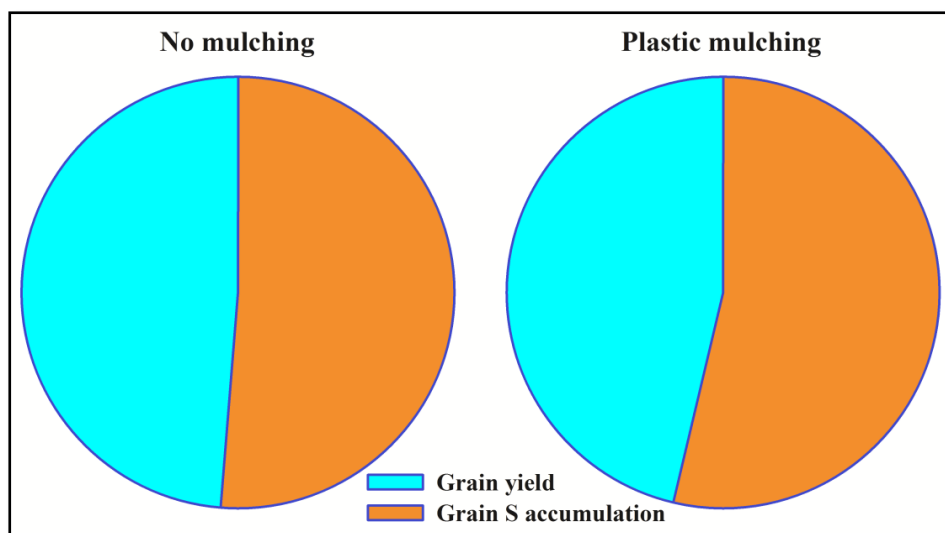

**FIGURE S5** Impact of grain yield and grain S accumulation on the contribution rate to grain S concentration of winter wheat in dryland under plastic mulching and no mulching.
